# Supplementary material
Source: PubMed Central journal article supplement (PMC8905701)
Supplement: advancesADV2021006917-suppl1.pdf [file advancesADV2021006917-suppl1.pdf]

## Supplemental Table 1

|                                   | n  | Time <sup>1</sup> |                | High dose chemotherapy |            |          |            |  |
|-----------------------------------|----|-------------------|----------------|------------------------|------------|----------|------------|--|
|                                   |    | Months            |                | Mit/Eto                | Cyta/dauno | ATRA/ATO | Bu/Cy/Auto |  |
|                                   |    | n                 | median (range) | n (%)                  | n (%)      | n (%)    | n (%)      |  |
| <b>AML/MDS</b>                    | 22 | NA                | 5              | 4                      | 1          | -        |            |  |
| During HD chemotherapy            | 5  | NA                | 1              | 3                      | 1          | -        |            |  |
| < 12 months after HD chemotherapy | 5  | 5 (1-12)          | 4              | 1                      | -          | -        |            |  |
| Autologous HCT                    | 12 | 8 (2-11)          | -              | -                      | -          | 12       |            |  |

  

|                              | n  | Time <sup>1</sup> |                | Current therapy |              | Immunosuppressants |         |           |          |       |  |
|------------------------------|----|-------------------|----------------|-----------------|--------------|--------------------|---------|-----------|----------|-------|--|
|                              |    | weeks             |                | Rituximab       | Lenalidomide | 0                  | 1 - 2   | >2        | steroids | Other |  |
|                              |    | n                 | median (range) | n (%)           | n (%)        | n (%)              | n (%)   | n (%)     | n (%)    | n (%) |  |
| <b>Autologous HCT</b>        |    |                   |                |                 |              |                    |         |           |          |       |  |
| Lymphoma <sup>2</sup> (BEAM) | 31 | 21 (4-44)         | 3 (9.7)        | 0 (0.0)         | 27 (87.1)    | 4 (12.9)           | 0 (0.0) | 1 (3.2)   | 3 (9.6)  |       |  |
| Multiple myeloma (HDM)       | 51 | 18 (1-41)         | 0              | 16 (31.4)       | 40 (78.4)    | 11 (21.6)          | 0 (0.0) | 11 (21.6) | 0        |       |  |
| <b>CAR T cell therapy</b>    |    |                   |                |                 |              |                    |         |           |          |       |  |
| CD19 directed                | 53 | 30 (1-346)        |                |                 |              |                    |         |           |          |       |  |

  

|                       | n  | Time <sup>1</sup> |                | Conditioning |         |                 |         |              |         |              |         | Donor      |           |              |           |             |         |          |       |       |       |       |       |
|-----------------------|----|-------------------|----------------|--------------|---------|-----------------|---------|--------------|---------|--------------|---------|------------|-----------|--------------|-----------|-------------|---------|----------|-------|-------|-------|-------|-------|
|                       |    | weeks             |                | ATG-Flu-TBI  |         | Cy-Flu-TBI-PTCy |         | Bu4-Flu-PTCy |         | Bu3-Flu-PTCy |         | BU-Flu-ATG |           | Flu-TBI-PTCy |           | FLAMSA-RIST |         | other    |       | Sib   | MUD   | CB    | Haplo |
|                       |    | n                 | median (range) | n (%)        | n (%)   | n (%)           | n (%)   | n (%)        | n (%)   | n (%)        | n (%)   | n (%)      | n (%)     | n (%)        | n (%)     | n (%)       | n (%)   | n (%)    | n (%) | n (%) | n (%) | n (%) | n (%) |
| <b>Allogeneic HCT</b> |    |                   |                |              |         |                 |         |              |         |              |         |            |           |              |           |             |         |          |       |       |       |       |       |
| < 6 months            | 54 | 12 (1-29)         | 10 (18.5)      | 4 (7.4)      | 5 (9.3) | 4 (7.4)         | 5 (9.3) | 4 (7.4)      | 4 (7.4) | 4 (7.4)      | 4 (7.4) | 4 (7.4)    | 4 (7.4)   | 10 (18.5)    | 12 (22.2) | 34 (63.0)   | 2 (3.7) | 6 (11.1) |       |       |       |       |       |
| Chronic GvHD          | 57 | 272 (39-865)      | 5 (9.3)        | 19 (35.2)    | 4 (7.4) | 1 (1.9)         | 0 (0.0) | 3 (5.6)      | 1 (1.9) | 0 (0.0)      | 2 (3.7) | 22 (38.6)  | 23 (40.4) | 31 (54.4)    | 1 (1.8)   | 2 (3.5)     |         |          |       |       |       |       |       |

  

|                       | n  | GvHD      |          | Immunosuppressants |           |           |           |           |           |
|-----------------------|----|-----------|----------|--------------------|-----------|-----------|-----------|-----------|-----------|
|                       |    | Acute     | Chronic  | 0                  | 1 - 2     | >2        | steroids  | MMF       | CI        |
|                       |    | n (%)     | n (%)    | n (%)              | n (%)     | n (%)     | n (%)     | n (%)     | n (%)     |
| <b>Allogeneic HCT</b> |    |           |          |                    |           |           |           |           |           |
| < 6 months            | 54 | 13 (24.1) | 6 (11.1) | 2 (3.7)            | 35 (64.8) | 17 (31.5) | 30 (55.6) | 17 (31.5) | 45 (83.3) |
| Chronic GvHD          | 57 |           | 57 (100) | 13 (23.2)          | 39 (69.6) | 4 (7.1)   | 12 (21.4) | 8 (14.0)  | 8 (14.0)  |

**Supplemental Table 1:** Baseline characteristics of AML/MDS and cell therapy cohorts. <sup>1</sup>Time: time since HCT, CAR T cell therapy or end of high dose (HD) chemotherapy. Mit/Eto: mitoxantrone, etoposide; Cyta / dauno: cytarabine, daunorubicine; Bu/Cy/Auto: busulphan, cyclophosphamide, autologous HCT; <sup>2</sup>B-NHL n=21, Hodgkin n=2, T-NHL n=8; BEAM: carmustine, etoposide, cytarabine, melphalan; HDM: high dose melphalan; ATG: antithymocyte globulin; Flu: fludarabine; TBI total body irradiation; PTCy: post-transplantation cyclophosphamide; FLAMSA-RIST: fludarabine, amsacrine cytarabine reduced intensity stem cell transplantation; sib: sibling; MUD: matched unrelated donor; CB: cord blood; haplo: haplo-identical donor ; MMF: mycophenolic acid; CI: calcineurin inhibitor.

## Supplemental Table 2

|                                   | <b>n</b><br>(%) | <b>Age</b><br>mean (SD) | <b>Sex</b><br>women (%) | <b>Seropositive at baseline</b><br>n (%) |
|-----------------------------------|-----------------|-------------------------|-------------------------|------------------------------------------|
| All PIENTER participants selected | 44              | 57 (10)                 | 30 (68)                 | 7 (16)                                   |
| With comorbidity                  | 21 (48)         | 62 (7)                  | 10 (48)                 | 2 (10)                                   |
| Using immunosuppressants          | 3 (6.8)         | 60 (8)                  | 2 (67)                  | 0 (0)                                    |

**Supplemental Table 2:** Baseline characteristics of the reference cohort. Participants were extracted from the PIENTER cohort, a Dutch population cohort study including randomly selected inhabitants of The Netherlands 12 years and older, when they fulfilled the following criteria: age 40-75 years, 2 doses mRNA1273 with the second dose 14-61 days previous to the moment of sample collection, not diagnosed with a hematologic condition.

### Supplemental Table 3

|                                                 | n   | Age<br>mean (SD) | Sex<br>women (%) | B cell (x10 <sup>9</sup> /l)<br>median (range) |
|-------------------------------------------------|-----|------------------|------------------|------------------------------------------------|
| <b>All patients</b>                             | 204 | 59 (11)          | 83 (40.9)        | 0.11 (0.0-88.94)                               |
| <b>Sickle cell disease</b>                      |     |                  |                  |                                                |
| Hydrea                                          | 11  | 39 (11)          | 6 (54.5)         | 0.54 (0.16-0.73)                               |
| <b>Lymphoma</b>                                 |     |                  |                  |                                                |
| During rituximab +/- chemotherapy               | 2   | 70 (6)           | 0 (0)            | 0.0 (0.0-0.0)                                  |
| < 12 months after rituximab +/- chemotherapy    | 6   | 60 (15)          | 2 (33.3)         | 0.013 (0.0-0.04)                               |
| < 12 months after autologous HCT (BEAM)         | 8   | 52 (15)          | 4 (50.0)         | 0.11 (0.0-0.19)                                |
| <b>Multiple myeloma</b>                         |     |                  |                  |                                                |
| 1st line therapy                                | 9   | 60 (9)           | 4 (44.4)         | 0.02 (0.0-0.04)                                |
| Daratumumab-containing therapy                  | 33  | 63 (7)           | 12 (36.4)        | 0.04 (0.0-0.62)                                |
| IMiDs                                           | 17  | 61 (8)           | 5 (29.4)         | 0.08 (0.01-0.27)                               |
| < 9 months after autologous HCT (HDM)           | 16  | 62 (6)           | 5 (33.3)         | 0.14 (0.0-86)                                  |
| <b>Chronic lymphocytic leukemia</b>             |     |                  |                  |                                                |
| Wait & see                                      | 17  | 64 (9)           | 9 (52.9)         | 8.06 (1.10-88.93)                              |
| Ibrutinib                                       | 6   | 61 (7)           | 3 (50.0)         | 1.62 (0.02-56.10)                              |
| <b>Chronic myeloid leukemia</b>                 |     |                  |                  |                                                |
| Tyrosine kinase inhibitors                      | 14  | 53 (11)          | 7 (50.0)         | 0.21 (0.13-0.50)                               |
| <b>Acute myeloid leukemia and high-risk MDS</b> |     |                  |                  |                                                |
| Hypomethylating therapy                         | 6   | 60 (20)          | 1 (16.7)         | 0.04 (0.0-0.10)                                |
| High-dose chemotherapy                          | 7   | 60 (11)          | 4 (57.1)         | 0.06 (0.0-0.59)                                |
| <b>Myeloproliferative disease</b>               |     |                  |                  |                                                |
| Ruxolitinib                                     | 20  | 58 (10)          | 10 (50.0)        | 0.18 (0.05-0.59)                               |
| <b>Allogeneic HCT</b>                           |     |                  |                  |                                                |
| < 6 months after HCT                            | 15  | 61 (11)          | 6 (40.0)         | 0.02 (0.0-0.28)                                |
| Chronic GvHD                                    | 15  | 60 (10)          | 4 (26.7)         | 0.22 (0.0-1.09)                                |
| <b>CAR T cell therapy</b>                       |     |                  |                  |                                                |
| CD19-directed                                   | 2   | 71 (2)           | 1 (50.0)         | 0.09 (0.0-0.17)                                |

**Supplemental Table 3:** Baseline characteristics of patients included in pseudovirus neutralisation analysis. These were all patients with S1 IgG 50-300 BAU/ML (n=67) and a random selection of patients with S1 IgG ≥300 BAU/ml (n=137 ).

## Supplemental Table 4

|                                                 | n  | No seroconversion<br>(%)<br><10 BAU/ml | Insufficient concentration<br>(%)<br>10-300 BAU/ml | Sufficient concentration<br>(%)<br>≥300 BAU/mL |
|-------------------------------------------------|----|----------------------------------------|----------------------------------------------------|------------------------------------------------|
| <b>All patients</b>                             | 34 | 2.9                                    | 5.8                                                | 91.2                                           |
| <b>Sickle cell disease</b>                      |    |                                        |                                                    |                                                |
| Hydrea                                          | 3  | 0                                      | 0                                                  | 100                                            |
| <b>Lymphoma</b>                                 |    |                                        |                                                    |                                                |
| During rituximab +/- chemotherapy               | 1  | 100                                    | 0                                                  | 0                                              |
| < 12 months after rituximab +/- chemotherapy    | 0  | NA                                     | NA                                                 | NA                                             |
| < 12 months after autologous HCT (BEAM)         | 0  | NA                                     | NA                                                 | NA                                             |
| <b>Multiple myeloma</b>                         |    |                                        |                                                    |                                                |
| 1st line therapy                                | 1  | 0                                      | 0                                                  | 100                                            |
| Daratumumab-containing therapy                  | 1  | 0                                      | 0                                                  | 100                                            |
| IMiDs                                           | 6  | 0                                      | 16.7                                               | 83.3                                           |
| < 9 months after autologous HCT (HDM)           | 5  | 0                                      | 0                                                  | 100                                            |
| <b>Chronic lymphocytic leukemia</b>             |    |                                        |                                                    |                                                |
| Wait & see                                      | 3  | 0                                      | 0                                                  | 100                                            |
| Ibrutinib                                       | 2  | 0                                      | 50                                                 | 50                                             |
| <b>Chronic myeloid leukemia</b>                 |    |                                        |                                                    |                                                |
| Tyrosine kinase inhibitors                      | 2  | 0                                      | 0                                                  | 100                                            |
| <b>Acute myeloid leukemia and high-risk MDS</b> |    |                                        |                                                    |                                                |
| Hypomethylating therapy                         | 0  | NA                                     | NA                                                 | NA                                             |
| High-dose chemotherapy                          | 1  | 0                                      | 0                                                  | 100                                            |
| <b>Myeloproliferative disease</b>               |    |                                        |                                                    |                                                |
| Ruxolitinib                                     | 3  | 0                                      | 0                                                  | 100                                            |
| <b>Allogeneic HCT</b>                           |    |                                        |                                                    |                                                |
| < 6 months after HCT                            | 1  | 0                                      | 0                                                  | 100                                            |
| Chronic GvHD                                    | 3  | 0                                      | 0                                                  | 100                                            |
| <b>CAR T cell therapy</b>                       |    |                                        |                                                    |                                                |
| CD19-directed                                   | 2  | 0                                      | 0                                                  | 100                                            |

**Supplemental Table 4:** S1-specific antibody concentration of previously infected participants after full vaccination with mRNA-1273. Previous SARS-CoV-2 infection was identified as N IgG >14.3 BAU/ml before vaccination ('pre').

## Supplemental Table 5

|                                                 | n   | No seroconversion | Insufficient concentration | Sufficient concentration |             |
|-------------------------------------------------|-----|-------------------|----------------------------|--------------------------|-------------|
|                                                 |     | <10 BAU/ml (%)    | 10-300 BAU/ml (%)          | ≥300 BAU/ml (%)          | 95% CP (CI) |
| <b>All patients</b>                             | 634 | 30.0              | 15.0                       | 55.0                     | 51.5-59.0   |
| <b>Sickle cell disease</b>                      |     |                   |                            |                          |             |
| Hydrea                                          | 25  | 0.0               | 4.0                        | 96.0                     | 79.6-99.9   |
| <b>Lymphoma</b>                                 |     |                   |                            |                          |             |
| During rituximab +/- chemotherapy               | 42  | 88.1              | 11.9                       | 0.0                      | 0.0-8.4     |
| < 12 months after rituximab +/- chemotherapy    | 38  | 55.3              | 18.4                       | 26.3                     | 13.4-43.1   |
| < 12 months after autologous HCT (BEAM)         | 27  | 44.4              | 22.2                       | 33.3                     | 16.5-54.0   |
| <b>Multiple myeloma</b>                         |     |                   |                            |                          |             |
| 1st line therapy                                | 23  | 26.1              | 21.7                       | 52.2                     | 30.6-73.2   |
| Daratumumab-containing therapy                  | 48  | 6.2               | 25.0                       | 68.8                     | 53.7-81.3   |
| IMiDs                                           | 48  | 10.4              | 12.5                       | 77.1                     | 62.7-88.0   |
| < 9 months after autologous HCT (HDM)           | 45  | 4.4               | 6.7                        | 88.9                     | 75.9-96.3   |
| <b>Chronic lymphocytic leukemia</b>             |     |                   |                            |                          |             |
| Wait & see                                      | 46  | 17.4              | 13.0                       | 69.6                     | 54.2-82.3   |
| Ibrutinib                                       | 34  | 61.8              | 11.8                       | 26.5                     | 12.9-44.4   |
| <b>Chronic myeloid leukemia</b>                 |     |                   |                            |                          |             |
| Tyrosine kinase inhibitors                      | 50  | 0.0               | 0.0                        | 100                      | 92.9-100    |
| <b>Acute myeloid leukemia and high-risk MDS</b> |     |                   |                            |                          |             |
| Hypomethylating therapy                         | 17  | 23.5              | 35.3                       | 41.2                     | 18.4-67.1   |
| High-dose chemotherapy                          | 16  | 6.2               | 0.0                        | 93.8                     | 69.8-99.8   |
| <b>Myeloproliferative disease</b>               |     |                   |                            |                          |             |
| Ruxolitinib                                     | 33  | 9.1               | 42.4                       | 48.5                     | 30.8-66.5   |
| <b>Allogeneic HCT</b>                           |     |                   |                            |                          |             |
| < 6 months after HCT                            | 49  | 46.9              | 20.4                       | 32.7                     | 19.9-47.5   |
| Chronic GvHD                                    | 49  | 18.4              | 12.2                       | 69.4                     | 54.6-81.7   |
| <b>CAR T cell therapy</b>                       |     |                   |                            |                          |             |
| CD19-directed                                   | 44  | 79.5              | 9.1                        | 11.4                     | 3.8-24.6    |

**Supplemental Table 5:** S1 IgG concentration of previously uninfected participants after 2 dose mRNA-1273. 95% Clopper-Pearson (CP) confidence interval (CI) is only indicated for patients who obtained S1 IgG ≥300 BAU/ml.

## Supplemental Table 6

|                                   | Model 1<br>(per subcategory of variables) |            |         | Model 2<br>(overall) |            |         | Model 3<br>(sensitivity analyses for CLL) |            |         |
|-----------------------------------|-------------------------------------------|------------|---------|----------------------|------------|---------|-------------------------------------------|------------|---------|
|                                   | OR                                        | 95% CI     | p-value | OR                   | 95% CI     | p-value | OR                                        | 95% CI     | p-value |
| <b>Clinical</b>                   |                                           |            |         |                      |            |         |                                           |            |         |
| Age                               | 0.97                                      | 0.96-0.99  | <0.001  | 0.97                 | 0.95-0.99  | 0.005   | ns.                                       |            |         |
| <b>Immunological</b>              |                                           |            |         |                      |            |         |                                           |            |         |
| IgG4 (g/L)                        | 1.96                                      | 1.27-3.04  | 0.002   | 1.84                 | 1.10-3.07  | 0.019   | ns.                                       |            |         |
| B cells (x10 <sup>9</sup> /L)     |                                           |            | <0.001  |                      |            | <0.001  |                                           |            | <0.001  |
| 0,1-5,0                           | ref.                                      | ref.       |         | ref.                 | ref.       |         | ref.                                      | ref.       |         |
| <0,1                              | 0.15                                      | 0.10-0.24  |         | 0.25                 | 0.15-0.42  |         | 0.21                                      | 0.12-0.37  |         |
| >5,0                              | 0.26                                      | 0.14-0.49  |         | 0.35                 | 0.18-0.67  |         | 1.15                                      | 0.40-3.28  |         |
| CD3 T cells (x10 <sup>9</sup> /L) | 1.74                                      | 1.21-2.51  | 0.003   | ns.                  |            |         | ns.                                       |            |         |
| CD8 T cells (x10 <sup>9</sup> /L) |                                           |            | <0.001  | ns.                  |            |         | ns.                                       |            |         |
| 0,7-2,1                           | ref.                                      | ref.       |         |                      |            |         |                                           |            |         |
| <0,7                              | 1.43                                      | 0.79-2.59  |         |                      |            |         |                                           |            |         |
| >2.1                              | 0.04                                      | 0.01-0.24  |         |                      |            |         |                                           |            |         |
| NK cells (x10 <sup>9</sup> /L)    |                                           |            | <0.001  |                      |            | <0.001  |                                           |            | 0.001   |
| 0,09-0,6                          | ref.                                      | ref.       |         | ref.                 | ref.       |         | ref.                                      | ref.       |         |
| <0,09                             | 0.82                                      | 0.53-1.26  |         | 0.66                 | 0.41-1.09  |         | 0.64                                      | 0.38-1.07  |         |
| > 0,6                             | 4.99                                      | 1.85-13.44 |         | 8.37                 | 2.87-24.42 |         | 14.84                                     | 2.96-74.44 |         |
| <b>Therapy</b>                    |                                           |            |         |                      |            |         |                                           |            |         |
| Immunosuppressants                |                                           |            | <0.001  |                      |            | 0.001   |                                           |            | <0.001  |
| 0                                 | ref.                                      | ref.       |         | ref.                 | ref.       |         | ref.                                      | ref.       |         |
| 1 to 2                            | 0.45                                      | 0.30-0.68  |         | 0.45                 | 0.28-0.73  |         | 0.35                                      | 0.21-0.59  |         |
| > 2                               | 0.23                                      | 0.10-0.53  |         | 0.25                 | 0.10-0.64  |         | 0.24                                      | 0.09-0.63  |         |
| CD20 antibody                     | 0.20                                      | 0.09-0.44  | <0.001  | 0.24                 | 0.10-0.57  | 0.001   | 0.27                                      | 0.11-0.65  | 0.004   |
| Lenalidomide/pomalidomide         | 2.49                                      | 1.37-4.51  | 0.003   | 3.46                 | 1.78-6.71  | <0.001  | 3.35                                      | 1.72-6.53  | <0.001  |
| Hydrea                            | 6.36                                      | 1.46-27.67 | 0.014   | ns.                  |            |         | ns.                                       |            |         |
| CAR T cell                        | 0.14                                      | 0.05-0.37  | <0.001  | 0.16                 | 0.06-0.48  | 0.001   | 0.16                                      | 0.05-0.48  | 0.001   |
| Tyrosine kinase inhibitor         | 5.23                                      | 2.16-12.65 | <0.001  | 2.74                 | 1.06-7.09  | 0.038   | 8.16                                      | 1.81-36.81 | 0.006   |
| Venetoclax                        | 0.11                                      | 0.02-0.54  | 0.006   | 0.11                 | 0.02-0.63  | 0.013   | ns.                                       |            |         |

**Supplemental Table 6:** Multivariable analyses. Variables significantly associated with positive response (S1 binding antibody concentration  $\geq 300$  BAU/ml) as a dichotomous outcome were tested in a multivariate model per subcategory of variables (Model 1) and significant variables of Model 1 were subsequently tested in an overall model (Model 2). Model 3 represents sensitivity analyses with CLL patients excluded from analyses. Analyses included previously uninfected patients only.

## Supplemental Table 7

|                                   | n  | Model 1 (univariable) |             |         |
|-----------------------------------|----|-----------------------|-------------|---------|
|                                   |    | OR                    | 95% CI      | p-value |
| <b>Lymphoma</b>                   | 65 |                       |             |         |
| Time (months) <sup>1,2</sup>      |    |                       |             | 0.069   |
| ≤2                                | 15 | ref.                  | ref.        |         |
| 2-4                               | 15 | 1.45                  | 0.26-8.01   |         |
| 4-6                               | 13 | 0.33                  | 0.03-3.68   |         |
| 6-8                               | 16 | 2.40                  | 0.47-12.13  |         |
| 8-10                              | 6  | 20.0                  | 1.65-241.72 |         |
| <b>Multiple myeloma</b>           | 45 |                       |             |         |
| Time (months) <sup>1</sup>        |    |                       |             | 0.98    |
| ≤2                                | 15 | ref.                  | ref.        |         |
| 2-4                               | 13 | 1.85                  | 0.15-23.07  |         |
| 4-6                               | 13 | 0.85                  | 0.10-7.04   |         |
| 6-8                               | 3  | NE                    | NE          |         |
| 8-10                              | 1  | NE                    | NE          |         |
| <b>Allogeneic HCT<sup>3</sup></b> | 49 |                       |             |         |
| Time (months) <sup>1</sup>        |    |                       |             | 0.272   |
| ≤2                                | 24 | ref.                  | ref.        |         |
| 2-4                               | 11 | 1.12                  | 0.22-5.66   |         |
| 4-6                               | 14 | 3.0                   | 0.74-12.13  |         |
| Mycophenolic acid                 | 15 | 0.40                  | 0.10-1.71   | 0.218   |
| Calcineurin inhibitor             | 41 | 0.41                  | 0.09-1.93   | 0.262   |
| Corticosteroids                   | 27 | 0.51                  | 0.15-1.69   | 0.269   |
| <b>Chronic GvHD</b>               | 50 |                       |             |         |
| Ruxolitinib                       | 12 | 0.33                  | 0.09-1.30   | 0.113   |
| Mycophenolic acid                 | 7  | 0.27                  | 0.05-1.38   | 0.115   |
| <b>CLL on ibrutinib</b>           | 36 |                       |             |         |
| Venetoclax                        | 8  | 0.00                  | 0.0         | 1.00    |

**Supplemental Table 7:** Univariable analyses for specific patient cohorts. Analyses included previously uninfected patients only. <sup>1</sup>Time after last rituximab; <sup>2</sup>time after HCT; <sup>3</sup>not including chronic GvHD cohort. NE: not estimable.

## Supplemental Figure 1

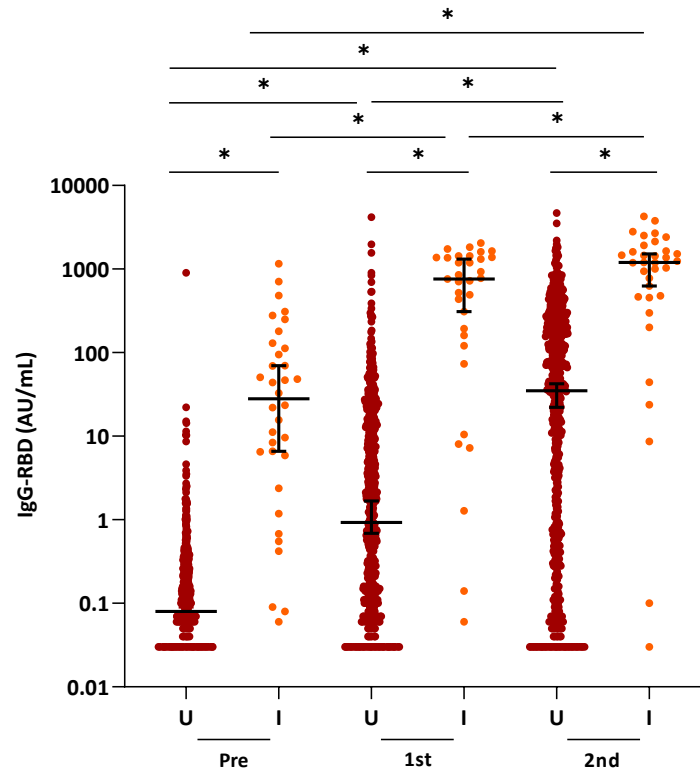

**Supplemental Figure 1.** Scatterplot of RBD IgG concentration for each timepoint. Dark red indicates previously uninfected participants (U), in orange previously infected individuals (I). Previous SARS-CoV-2 infection was identified as N IgG >14.3 BAU/ml before vaccination ('pre'). Timepoints: pre: before first vaccination; 1<sup>st</sup>: 4 weeks after the first vaccination; 2<sup>nd</sup>: 4 weeks after the 2<sup>nd</sup> vaccination.
